# Supplementary material for: Combined Cytotoxicity of the Phycotoxin Okadaic Acid and Mycotoxins on Intestinal and Neuroblastoma Human Cell Models
Source: MDPI journal article supplement (doi:10.3390/toxins10120526), 2018-12-08
Supplement: s1 [file s1]

# Supplementary Materials: Combined Cytotoxicity of the Phycotoxin Okadaic Acid and Mycotoxins on Intestinal and Neuroblastoma Human Cell Models

Aiko Hayashi, Juan José Dorantes-Aranda, John P. Bowman and Gustaaf Hallegraef

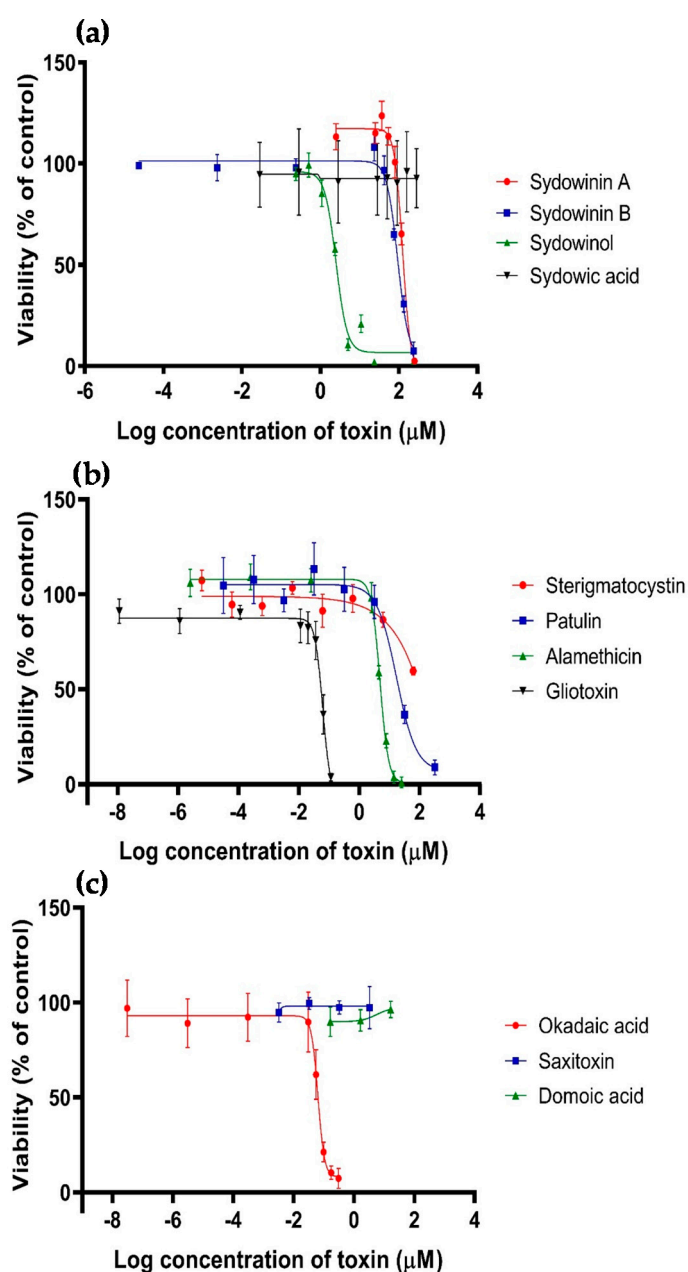

**Figure S1.** Dose–response curves of (a) major *A. sydowii* metabolites, (b) dust storm/shellfish-associated mycotoxins, and (c) algal toxins on human intestinal HT-29 cells. Data are mean  $\pm$  SD of four replicates.

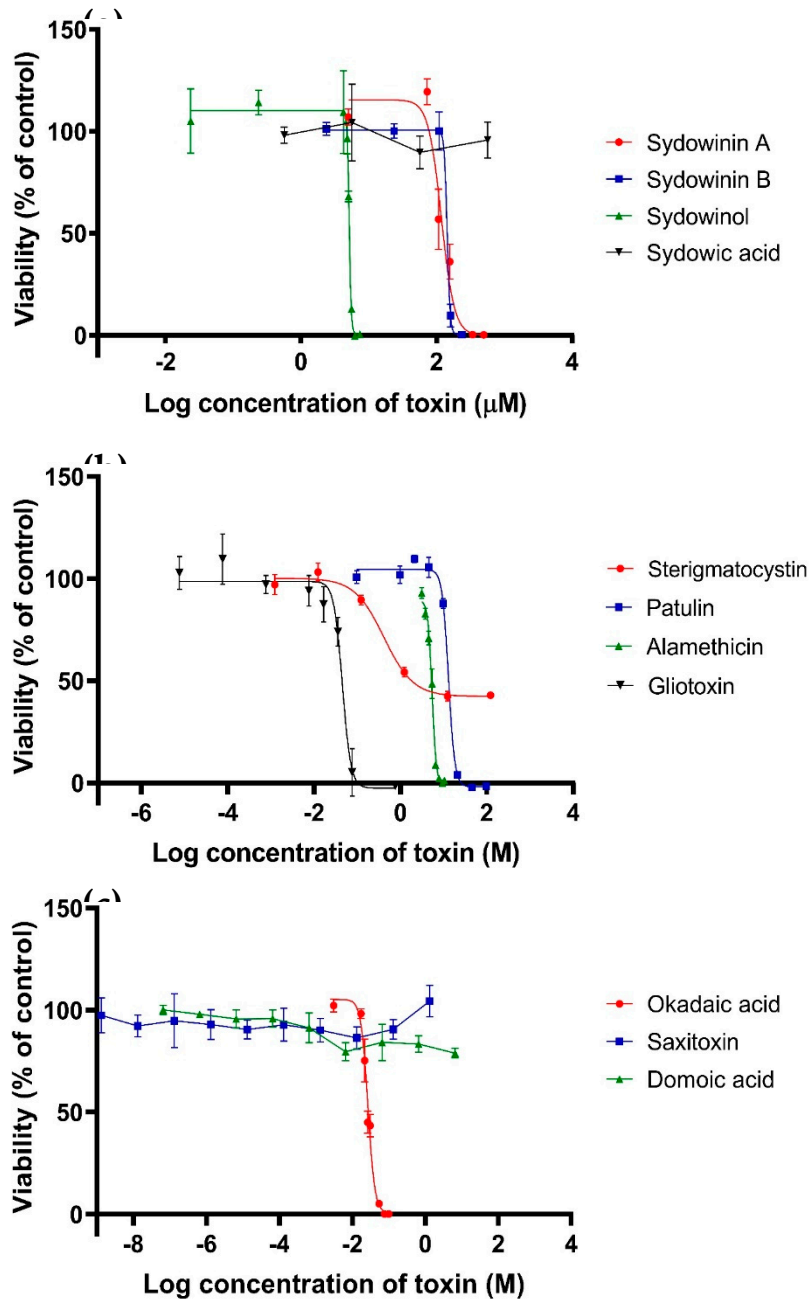

**Figure S2.** Dose–response curves of (a) major *A. sydowii* metabolites, (b) dust storm/shellfish-associated mycotoxins, and (c) algal toxins on human neuroblastoma SH-SY5Y cells. Data are mean  $\pm$  SD of four replicates.

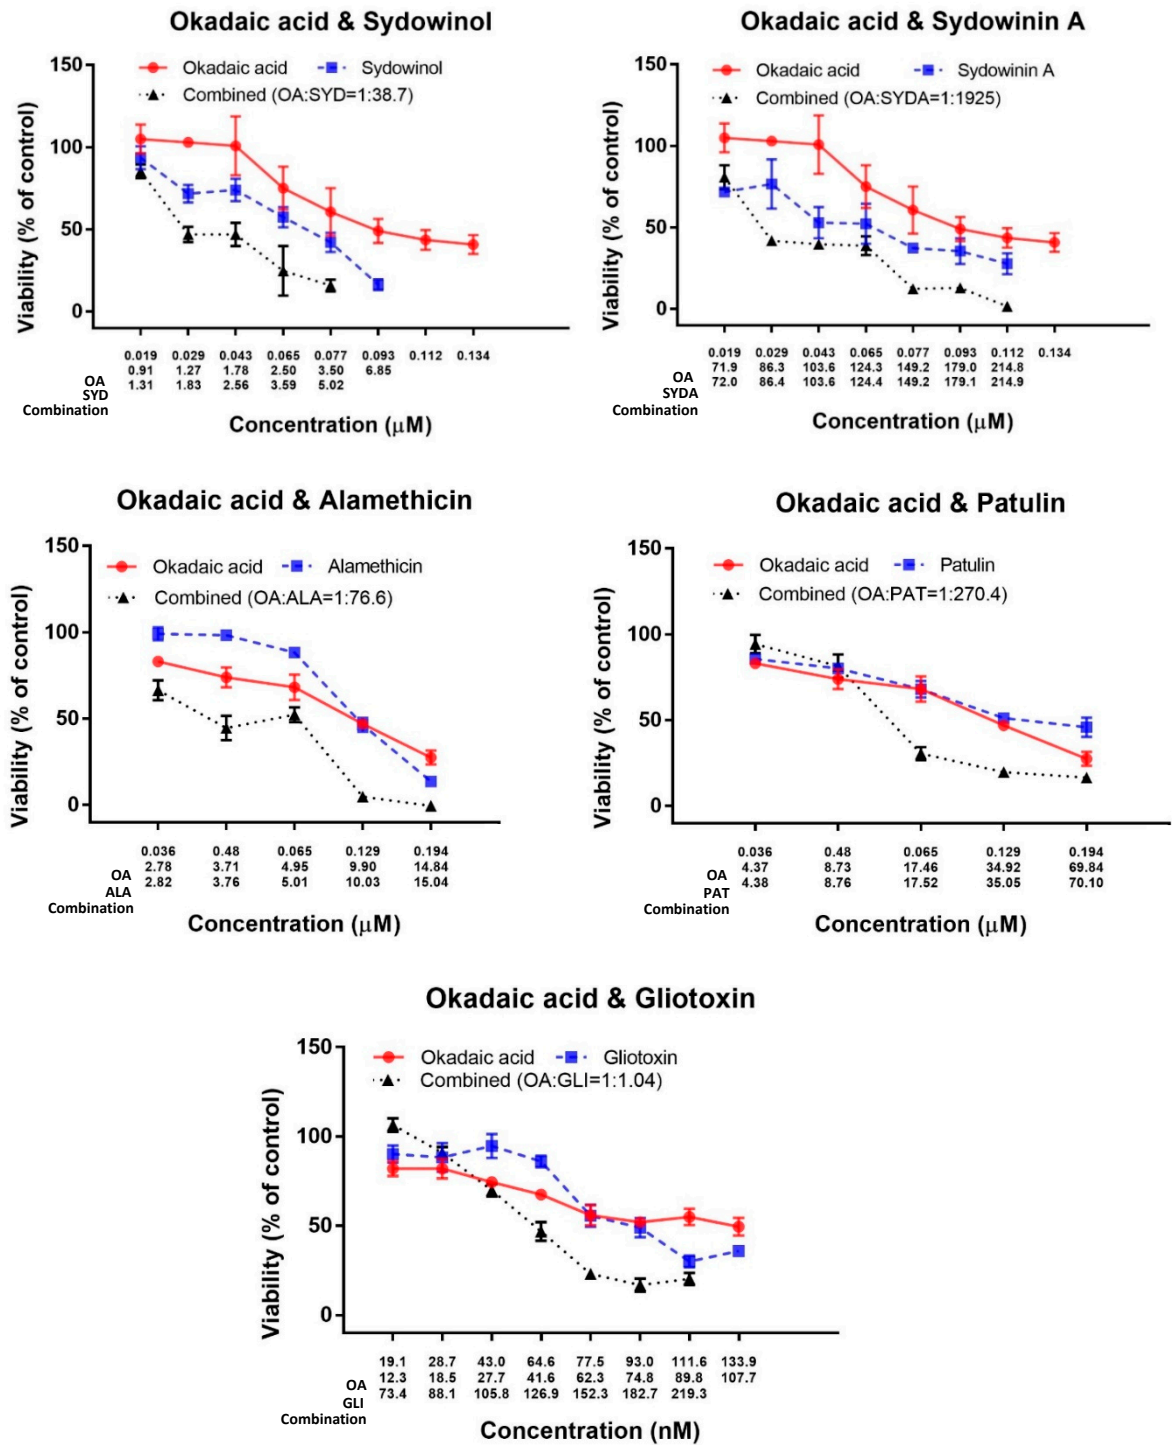

**Figure S3.** Okadaic acid (OA), sydwonin (SYD), sydowsinin A (SYDA), alamethicin (ALA), patulin (PAT), and gliotoxin (GLI) and their binary mixture dose–responses for cytotoxicity against human intestinal HT-29 cell line. Concentrations in combinations were expressed as the sum of the concentrations of two toxins. Data are mean ± SD of four replicates.

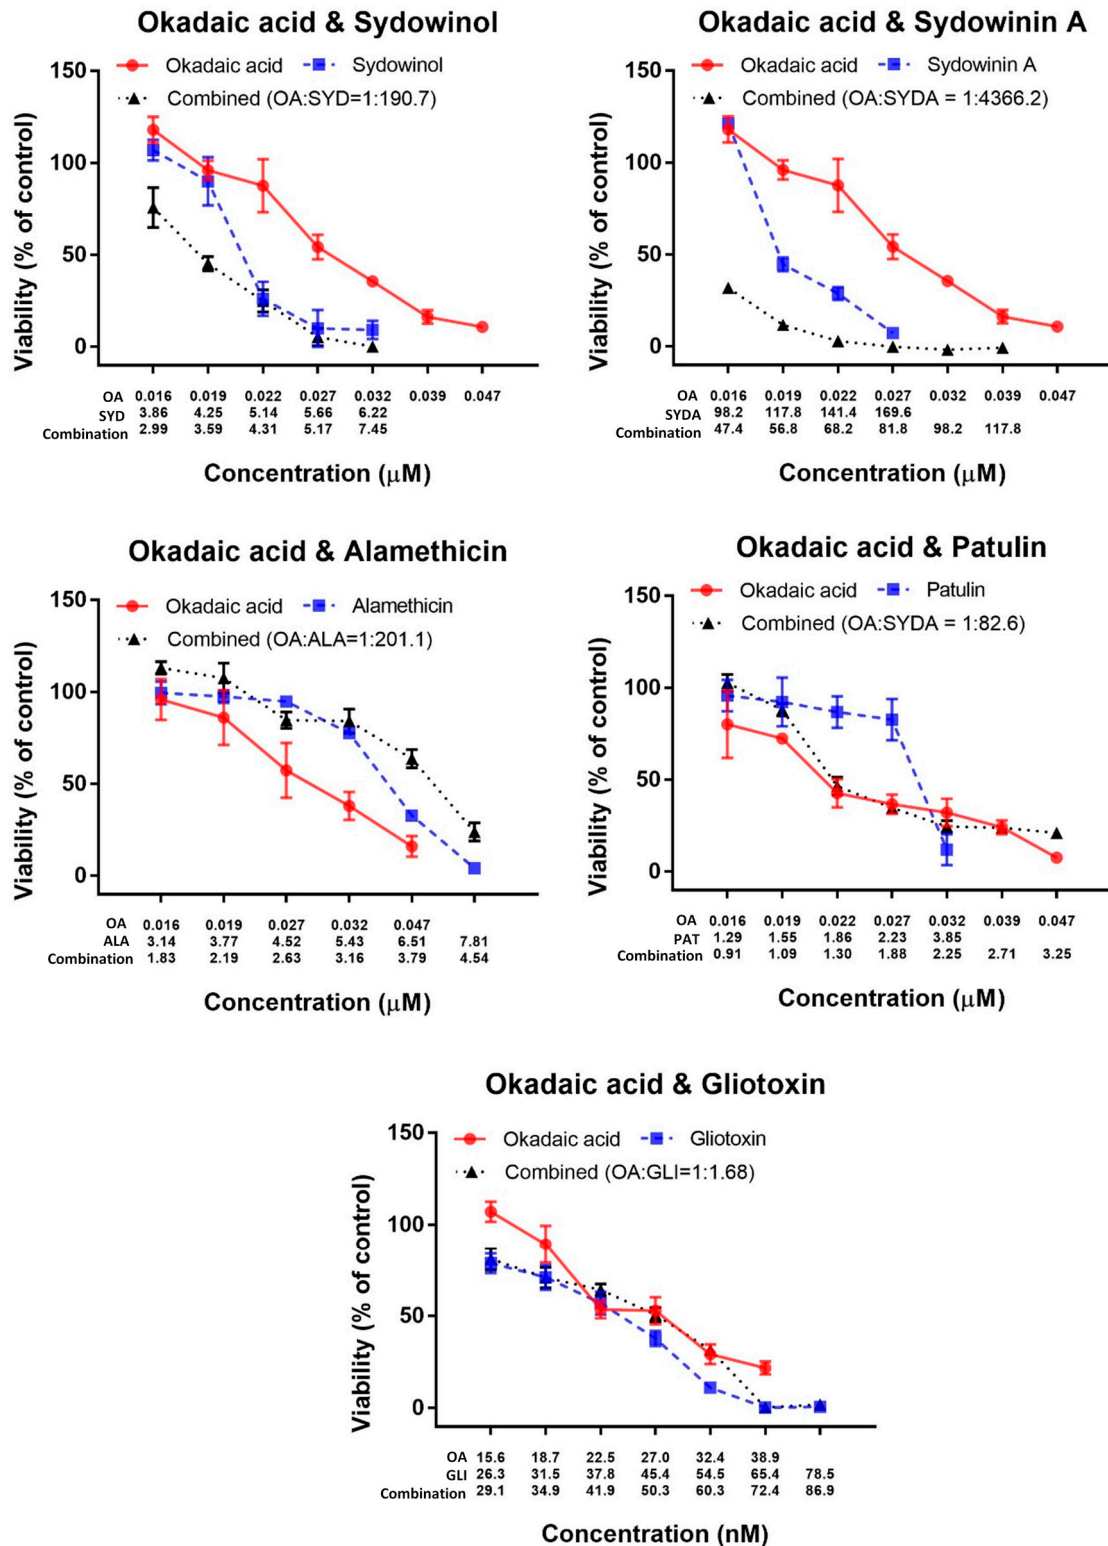

**Figure S4.** Okadaic acid (OA), sydowninol (SYD), sydownin A (SYDA), alamethicin (ALA), patulin (PAT), and gliotoxin (GLI) and their binary mixture dose–responses for cytotoxicity against human neuroblastoma SH-SY5Y cell line. Concentrations in combinations were expressed as the sum of the concentrations of two toxins. Data are mean ± SD of four replicates.
